# Supplementary material for: Two-dimensional NiCl2 monolayers as a promising multifunctional anchoring material in sodium–sulfur batteries
Source: Royal Society of Chemistry journal article supplement (doi:10.1039/d3nj03271j), 2023-01-01
Supplement: d3nj03271j1.pdf [file d3nj03271j1.pdf]

## Electronic Supporting Information (ESI)

### **Two-Dimensional NiCl<sub>2</sub> Monolayer as a Promising Multifunctional Anchoring Material in Sodium–Sulfur Batteries**

Lei Chen,<sup>a,#</sup> Shuxin Gui,<sup>a,#</sup> Jingxiang Zhao<sup>a</sup>

<sup>a</sup> *Key Laboratory for Photonic and Electronic Bandgap Materials, Ministry of Education, School of Physics and Electronic Engineering, Harbin Normal University, Harbin, 150025, P. R. China*

*To whom correspondence should be addressed. Email: [zhaojingxiang@hrbnu.edu.cn](mailto:zhaojingxiang@hrbnu.edu.cn)*

*(J. Zhao)*

<sup>#</sup> *Lei Chen and Shuxin Gui contribute equally to this work.*

**Table S1.** The computed binding energies of  $S_8$  and  $Na_2S_n$  intermediates on  $NiCl_2$  monolayers using DFT+U and standard DFT methods.

|           | DFT+U | DFT  |
|-----------|-------|------|
| $Na_2S$   | 2.40  | 2.44 |
| $Na_2S_2$ | 2.61  | 2.69 |
| $Na_2S_4$ | 1.88  | 1.99 |
| $Na_2S_6$ | 0.95  | 0.98 |
| $Na_2S_8$ | 1.21  | 1.31 |
| $S_8$     | 0.47  | 0.56 |

**Table S2.** The computed binding energies between long-chain  $\text{Na}_2\text{S}_n$  intermediates and DME/DOL

|                                    |      |
|------------------------------------|------|
| $\text{Na}_2\text{S}_4/\text{DME}$ | 0.59 |
| $\text{Na}_2\text{S}_6/\text{DME}$ | 0.43 |
| $\text{Na}_2\text{S}_8/\text{DME}$ | 1.07 |
| $\text{Na}_2\text{S}_4/\text{DOL}$ | 0.65 |
| $\text{Na}_2\text{S}_6/\text{DOL}$ | 0.84 |
| $\text{Na}_2\text{S}_8/\text{DOL}$ | 0.93 |

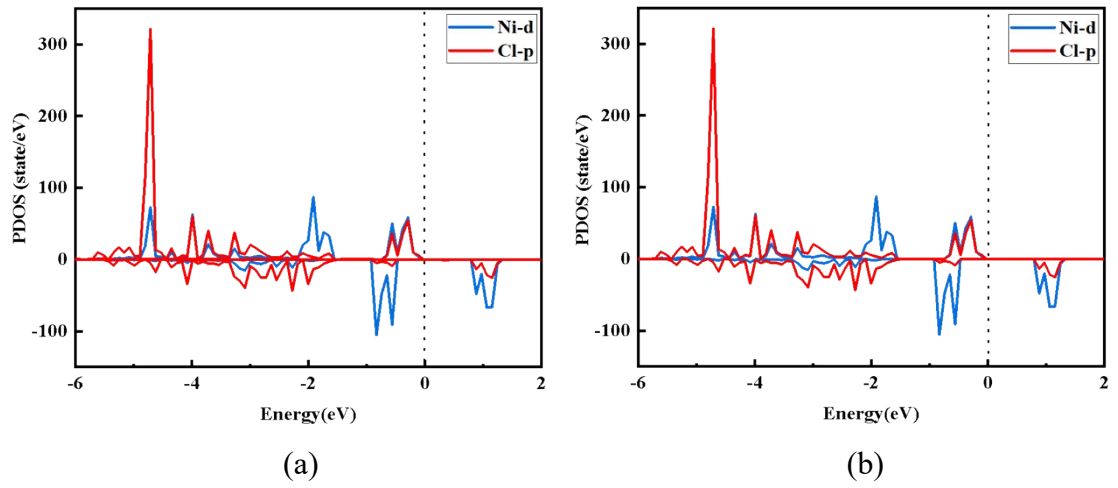

**Fig. S1.** The computed projected density of states (PDOSs) using (a) DFT+U and (b) DFT methods.

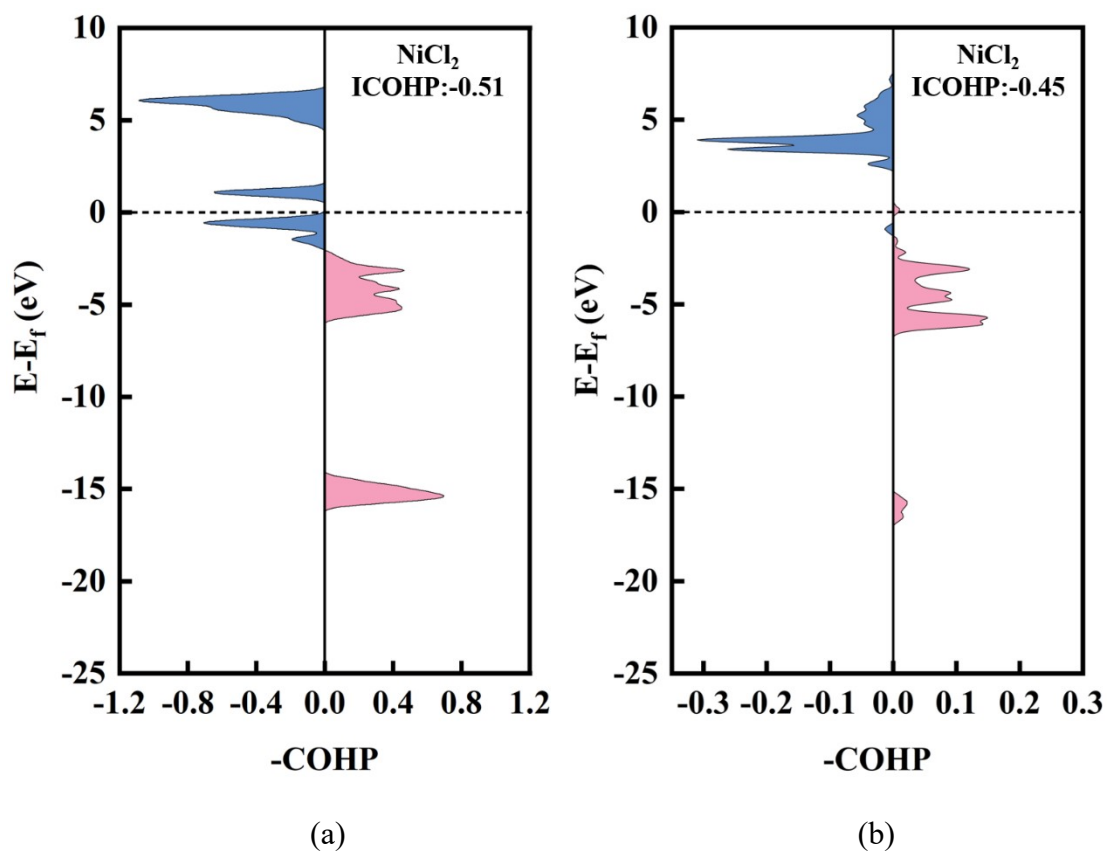

**Fig. S2.** The computed crystal orbital Hamilton populations (COHPs), and integrated COHP (ICOHP) between Na atom of  $\text{Na}_2\text{S}_4$  cluster and Cl atom of  $\text{NiCl}_2$  using (a) DFT+U and (b) DFT methods.

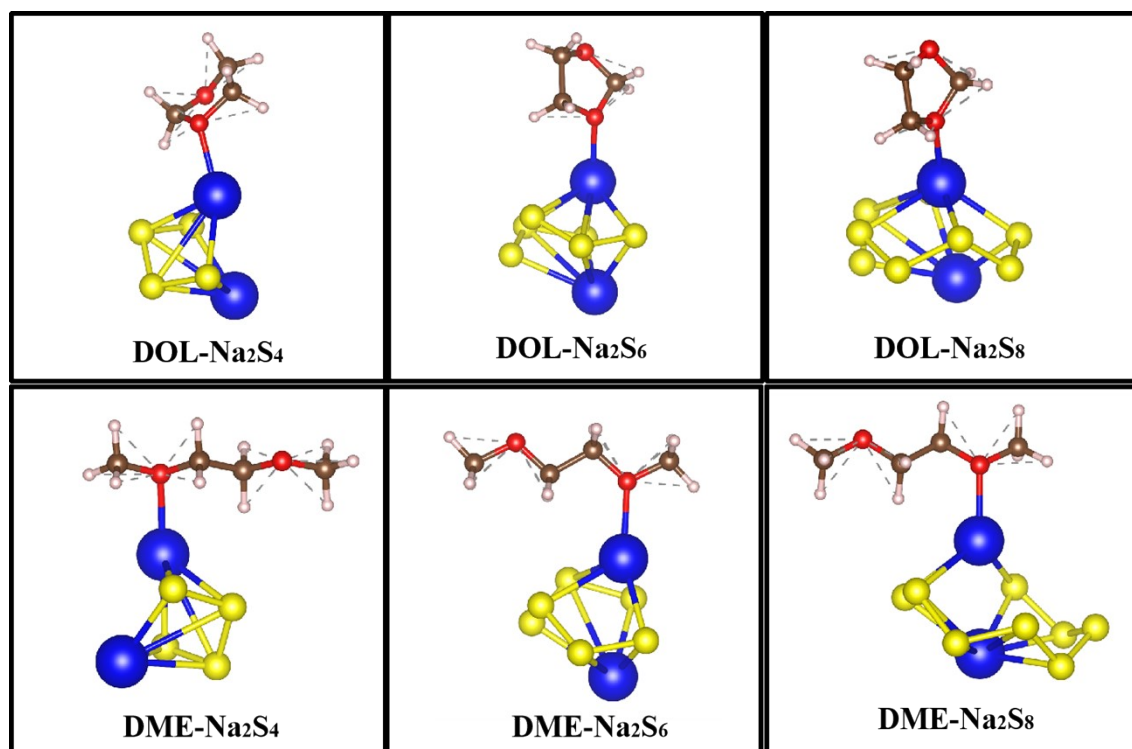

**Fig. S3.** The optimized structures for the interactions between Na<sub>2</sub>S<sub>n</sub> intermediates and DME/DOL.
